# Supplementary material for: Growth, maturity, and diet of the pearl whipray ( Fontitrygon margaritella ) from the Bijagós Archipelago, Guinea-Bissau
Source: PeerJ journal article supplement (doi:10.7717/peerj.12894), 2022-03-07
Supplement: Clements_etal_FigS1_.pdf [file Clements_etal_FigS1_.pdf]

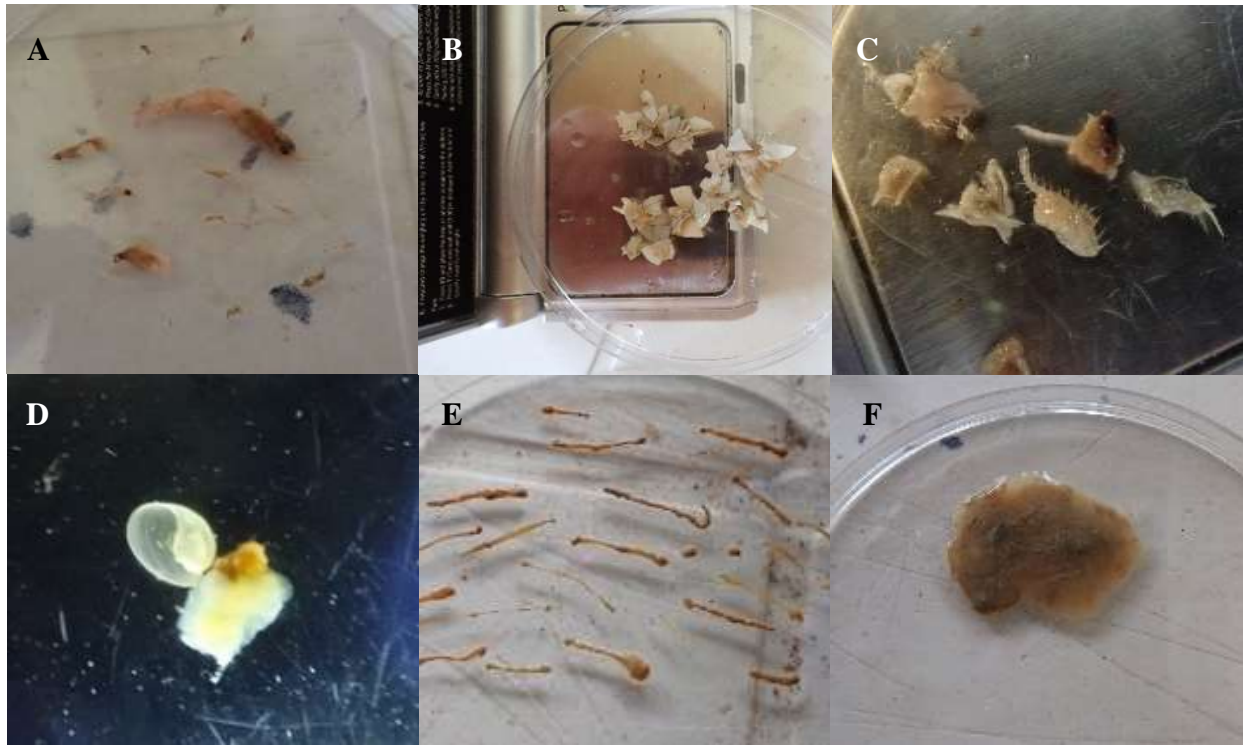

**Figure S1: Representative photo of each taxa group found in stomach content. (A)** crustaceans. (B) bivalves. (C) teleosts. (D) other molluscs. (E) polychaetes. (F) unidentified.
